# Supplementary material for: Obesity of Sows at Late Pregnancy Aggravates Metabolic Disorder of Perinatal Sows and Affects Performance and Intestinal Health of Piglets
Source: PubMed Central journal article supplement (PMC7023453; doi:10.3390/ani10010049), 2019-12-25
Supplement: animals-10-00049-s001.pdf [file animals-10-00049-s001.pdf]

**Table S1.** Ingredients and nutrient composition of experimental gestation and lactation diets (as-fed basis).

| <b>Ingredients</b>             | <b>Gestation diet</b> | <b>Lactation diet</b> |
|--------------------------------|-----------------------|-----------------------|
| Ingredient, %                  |                       |                       |
| Corn                           | 54.80                 | 54.40                 |
| Soybean meal, 43%CP            | 11.50                 | 26.00                 |
| Wheat bran                     | 0.00                  | 11.00                 |
| Soybean hull                   | 14.00                 | 0.00                  |
| Rice bran meal                 | 16.00                 | 0.00                  |
| Calcium carbonate              | 1.20                  | 1.51                  |
| Dicalcium phosphate            | 1.00                  | 1.23                  |
| Salt                           | 0.40                  | 0.26                  |
| Mildewcide <sup>1</sup>        | 0.10                  | 0.10                  |
| Choline chloride               | 0.00                  | 1.00                  |
| Premix <sup>2</sup>            | 1.00                  | 1.50                  |
| Nutrient composition           |                       |                       |
| Net energy, MJ/kg <sup>3</sup> | 9.53                  | 10.36                 |
| Crude protein, %               | 13.96                 | 18.92                 |
| ISF, % <sup>4</sup>            | 26.95                 | 14.45                 |
| SF, % <sup>5</sup>             | 2.85                  | 1.76                  |
| NDF, % <sup>6</sup>            | 15.70                 | 11.18                 |
| ADF, % <sup>7</sup>            | 5.47                  | 4.26                  |
| Lys, % <sup>3</sup>            | 0.59                  | 1.03                  |
| Ca, % <sup>3</sup>             | 0.78                  | 1.06                  |
| Available P, % <sup>3</sup>    | 0.40                  | 0.45                  |

<sup>1</sup>Mildewcide: ammonium propionate.

<sup>2</sup>Provided per kg of diet: Cu, 30 mg; Fe, 160 mg; Zn, 160 mg; Mn, 55 mg; I, 0.5 mg; Se, 0.5 mg; Co, 0.8 mg; Cr, 0.2 mg; Vitamin A, 14000 IU; Vitamin D<sub>3</sub>, 2900 IU; Vitamin E, 120 mg; Vitamin K<sub>3</sub>, 6 mg; Vitamin B<sub>1</sub>, 2.4 mg; Vitamin B<sub>2</sub>, 8.5 mg; Vitamin B<sub>6</sub>, 4.5 mg; Vitamin B<sub>12</sub>, 0.03 mg; Vitamin H, 0.55 mg; Pantothenic acid, 30 mg; Folic acid, 5 mg; Nicotinamide, 50 mg.

<sup>3</sup>Calculated chemical concentrations using values for feed ingredients from the NRC (2012).

<sup>4</sup>insoluble fiber.

<sup>5</sup>solubel fiber.

<sup>6</sup>neutral detergent fiber.

<sup>7</sup>acid detergent fiber.
